# Supplementary material
Source: publisher site journal article supplement (https://www.dovepress.com/article/512561)
Supplement: Supplementary file 1 [file Supplementary%2520Material%2520Table%2520S1.docx]

**Table S1**: Primer sequences, accession numbers, annealing temperatures (Tm), Product sizes

| Gene | Primer sequences | Accession No. | Tm (°C) | Product sizes (bp) |
| --- | --- | --- | --- | --- |
| IPCRL1 | F 5'-AAGACTGCTCTGCCTGGT-3' | ENSMUST0  0000123752 | 56.5 | 215 |
| R 5'-GCTCTGAAGACATCCGTTGA-3' | 54.6 |
| JIP3 | F 5'-GTAGCGGCCAAACAGAAAGC-3' | NM_001163449.1 | 57.4 | 176 |
| R 5'-TGTGGTACTGGGTGTTGCAG-3' | 57.9 |
| TNF-α | F 5'-GTAGCCCACGTCGTAGCAAA-3' | NM_013693.3 | 57.8 | 137 |
| R 5'-ACAAGGTACAACCCATCGGC-3' | 58.0 |
| GAPDH | F 5′-AGGAGAGTGTTTCCTCGTCC-3′ | NM_001289726.2 | 56.5 | 135 |
| R 5′-GAAGGGGTCGTTGATGGCAA-3′ | 58.2 |
| miR-185-3P | F 5'-AGGGGCTGGCTTTCCTCTGGT-3 | NR_029571.1‌ | 64.4 | 72 |
| U6 | F 5'-CTCGCTTCGGCAGCACA-3' | NM_133954.3 | 59.4 | 94 |
| R 5'-AACGCTTCACGAATTTGCGT-3' | 55.6 |

NOTE：F，forward; R，reverse
